# Supplementary material
Source: publisher figshare collection journal article supplement (https://acs.figshare.com/ndownloader/files/5191531)
Supplement: Supplementary file 1 [file 5191531]

data_dal0386
_publ_requested_journal          J.Am.Chem.Soc.
_publ_contact_author_name        'Neil Burford'
_publ_contact_author_address     
;Department of Chemistry
Dalhousie University
Halifax, NS
B3H 4J3, CANADA
;
_publ_contact_author_email       Neil.Burford@dal.ca
_publ_contact_author_phone       902-494-1390
_publ_contact_author_fax         902-494-1310

_audit_creation_method           SHELXL-97
_chemical_name_systematic        ?
_chemical_name_common            ?
_chemical_melting_point          450
_chemical_formula_moiety         'C41 H50 Al Cl2 N2 P'
_chemical_formula_sum            'C41 H50 Al Cl2 N2 P'
_chemical_formula_weight         699.68

loop_
_atom_type_symbol
_atom_type_description
_atom_type_scat_dispersion_real
_atom_type_scat_dispersion_imag
_atom_type_scat_source
C C 0.0033 0.0016 'International Tables Vol C Tables 4.2.6.8 and 6.1.1.4'
H H 0.0000 0.0000 'International Tables Vol C Tables 4.2.6.8 and 6.1.1.4'
N N 0.0061 0.0033 'International Tables Vol C Tables 4.2.6.8 and 6.1.1.4'
Al Al 0.0645 0.0514 'International Tables Vol C Tables 4.2.6.8 and 6.1.1.4'
P P 0.1023 0.0942 'International Tables Vol C Tables 4.2.6.8 and 6.1.1.4'
Cl Cl 0.1484 0.1585 'International Tables Vol C Tables 4.2.6.8 and 6.1.1.4'

_symmetry_cell_setting           orthorhombic
_symmetry_space_group_name_H-M   Pbca
_symmetry_Int_Tables_number      61

loop_
_symmetry_equiv_pos_as_xyz
'x, y, z'
'-x+1/2, -y, z+1/2'
'-x, y+1/2, -z+1/2'
'x+1/2, -y+1/2, -z'
'-x, -y, -z'
'x-1/2, y, -z-1/2'
'x, -y-1/2, z-1/2'
'-x-1/2, y-1/2, z'

_cell_length_a                   18.3867(11)
_cell_length_b                   20.2465(12)
_cell_length_c                   21.2320(13)
_cell_angle_alpha                90.00
_cell_angle_beta                 90.00
_cell_angle_gamma                90.00
_cell_volume                     7904.0(8)
_cell_formula_units_Z            8
_cell_measurement_temperature    193(2)
_cell_measurement_reflns_used    ?
_cell_measurement_theta_min      2.215
_cell_measurement_theta_max      25.914

_exptl_crystal_description       fragment
_exptl_crystal_colour            colourless
_exptl_crystal_size_max          0.32
_exptl_crystal_size_mid          0.16
_exptl_crystal_size_min          0.13
_exptl_crystal_density_meas      ?
_exptl_crystal_density_diffrn    1.176
_exptl_crystal_density_method    'not measured'
_exptl_crystal_F_000             2976
_exptl_absorpt_coefficient_mu    0.257
_exptl_absorpt_correction_type   empirical
_exptl_absorpt_correction_T_min  0.9223
_exptl_absorpt_correction_T_max  0.9674
_exptl_absorpt_process_details   'SADABS (Sheldrick, 1996)'

_exptl_special_details           
;
 ?
;

_diffrn_ambient_temperature      193(2)
_diffrn_radiation_wavelength     0.71073
_diffrn_source                   'fine-focus sealed tube'
_diffrn_radiation_type           MoK\a
_diffrn_radiation_probe          x-ray
_diffrn_radiation_monochromator  graphite
_diffrn_measurement_device_type  ?
_diffrn_measurement_method       ?
_diffrn_detector_area_resol_mean ?
_diffrn_standards_number         ?
_diffrn_standards_interval_count ?
_diffrn_standards_interval_time  ?
_diffrn_standards_decay_%        ?
_diffrn_reflns_number            48531
_diffrn_reflns_av_R_equivalents  0.1194
_diffrn_reflns_av_sigmaI/netI    0.0739
_diffrn_reflns_limit_h_min       -22
_diffrn_reflns_limit_h_max       23
_diffrn_reflns_limit_k_min       -25
_diffrn_reflns_limit_k_max       25
_diffrn_reflns_limit_l_min       -26
_diffrn_reflns_limit_l_max       26
_diffrn_reflns_theta_min         1.78
_diffrn_reflns_theta_max         26.49
_reflns_number_total             8131
_reflns_number_gt                5024
_reflns_threshold_expression     >2sigma(I)

_computing_data_collection       ?
_computing_cell_refinement       ?
_computing_data_reduction        ?
_computing_structure_solution    ?
_computing_structure_refinement  'SHELXL-97 (Sheldrick, 1997)'
_computing_molecular_graphics    ?
_computing_publication_material  ?

_refine_special_details          
;
 Refinement of F^2^ against ALL reflections.  The weighted R-factor wR and
 goodness of fit S are based on F^2^, conventional R-factors R are based
 on F, with F set to zero for negative F^2^. The threshold expression of
 F^2^ > 2sigma(F^2^) is used only for calculating R-factors(gt) etc. and is
 not relevant to the choice of reflections for refinement.  R-factors based
 on F^2^ are statistically about twice as large as those based on F, and R-
 factors based on ALL data will be even larger.
;

_refine_ls_structure_factor_coef Fsqd
_refine_ls_matrix_type           full
_refine_ls_weighting_scheme      calc
_refine_ls_weighting_details     
'calc w=1/[\s^2^(Fo^2^)+(0.0531P)^2^+4.2710P] where P=(Fo^2^+2Fc^2^)/3'
_atom_sites_solution_primary     direct
_atom_sites_solution_secondary   difmap
_atom_sites_solution_hydrogens   geom
_refine_ls_hydrogen_treatment    mixed
_refine_ls_extinction_method     none
_refine_ls_extinction_coef       ?
_refine_ls_number_reflns         8131
_refine_ls_number_parameters     424
_refine_ls_number_restraints     0
_refine_ls_R_factor_all          0.1092
_refine_ls_R_factor_gt           0.0564
_refine_ls_wR_factor_ref         0.1380
_refine_ls_wR_factor_gt          0.1175
_refine_ls_goodness_of_fit_ref   1.007
_refine_ls_restrained_S_all      1.007
_refine_ls_shift/su_max          0.001
_refine_ls_shift/su_mean         0.000

loop_
_atom_site_label
_atom_site_type_symbol
_atom_site_fract_x
_atom_site_fract_y
_atom_site_fract_z
_atom_site_U_iso_or_equiv
_atom_site_adp_type
_atom_site_occupancy
_atom_site_symmetry_multiplicity
_atom_site_calc_flag
_atom_site_refinement_flags
_atom_site_disorder_assembly
_atom_site_disorder_group
Cl1 Cl 0.74228(5) 0.18334(5) 0.62053(4) 0.0527(3) Uani 1 1 d . . .
Cl2 Cl 0.70801(6) 0.07625(4) 0.74684(4) 0.0607(3) Uani 1 1 d . . .
P P 0.47807(4) 0.22264(4) 0.54012(3) 0.02547(17) Uani 1 1 d . . .
Al Al 0.66201(5) 0.13521(4) 0.67583(4) 0.0288(2) Uani 1 1 d . . .
N1 N 0.60269(12) 0.08579(11) 0.62271(10) 0.0249(5) Uani 1 1 d . . .
N2 N 0.59266(12) 0.19599(10) 0.70347(10) 0.0242(5) Uani 1 1 d . . .
C1 C 0.51279(16) 0.08084(14) 0.53774(14) 0.0326(7) Uani 1 1 d . . .
H1A H 0.5342 0.0368 0.5329 0.039 Uiso 1 1 calc R . .
H1B H 0.5182 0.1056 0.4983 0.039 Uiso 1 1 calc R . .
H1C H 0.4610 0.0766 0.5479 0.039 Uiso 1 1 calc R . .
C2 C 0.55114(15) 0.11724(13) 0.59026(12) 0.0243(6) Uani 1 1 d . . .
C3 C 0.52761(14) 0.18252(13) 0.60434(12) 0.0239(6) Uani 1 1 d . . .
C4 C 0.54025(15) 0.21470(13) 0.66347(12) 0.0252(6) Uani 1 1 d . . .
C5 C 0.49209(16) 0.27120(14) 0.68270(13) 0.0327(7) Uani 1 1 d . . .
H5A H 0.5079 0.2881 0.7237 0.039 Uiso 1 1 calc R . .
H5B H 0.4417 0.2558 0.6857 0.039 Uiso 1 1 calc R . .
H5C H 0.4953 0.3065 0.6512 0.039 Uiso 1 1 calc R . .
C11 C 0.61704(16) 0.01619(13) 0.60922(13) 0.0289(7) Uani 1 1 d . . .
C12 C 0.66210(17) -0.00172(14) 0.55925(14) 0.0332(7) Uani 1 1 d . . .
C13 C 0.67295(19) -0.06912(15) 0.54793(15) 0.0421(8) Uani 1 1 d . . .
H13 H 0.7031 -0.0826 0.5140 0.050 Uiso 1 1 calc R . .
C14 C 0.6407(2) -0.11572(16) 0.58516(16) 0.0483(9) Uani 1 1 d . . .
H14 H 0.6483 -0.1612 0.5766 0.058 Uiso 1 1 calc R . .
C15 C 0.5974(2) -0.09748(15) 0.63477(16) 0.0457(9) Uani 1 1 d . . .
H15 H 0.5751 -0.1306 0.6599 0.055 Uiso 1 1 calc R . .
C16 C 0.58547(18) -0.03154(14) 0.64893(14) 0.0353(7) Uani 1 1 d . . .
C17 C 0.69947(18) 0.04814(15) 0.51651(15) 0.0397(8) Uani 1 1 d . . .
H17 H 0.6820 0.0932 0.5285 0.048 Uiso 1 1 calc R . .
C17A C 0.7816(2) 0.04611(19) 0.5264(2) 0.0635(11) Uani 1 1 d . . .
H17A H 0.7927 0.0536 0.5710 0.076 Uiso 1 1 calc R . .
H17B H 0.8047 0.0806 0.5009 0.076 Uiso 1 1 calc R . .
H17C H 0.8003 0.0028 0.5136 0.076 Uiso 1 1 calc R . .
C17B C 0.6814(3) 0.03728(19) 0.44692(16) 0.0676(12) Uani 1 1 d . . .
H17D H 0.6285 0.0387 0.4411 0.081 Uiso 1 1 calc R . .
H17E H 0.6999 -0.0059 0.4335 0.081 Uiso 1 1 calc R . .
H17F H 0.7041 0.0721 0.4216 0.081 Uiso 1 1 calc R . .
C18 C 0.5378(2) -0.01242(16) 0.70463(15) 0.0473(9) Uani 1 1 d . . .
H18 H 0.5559 0.0311 0.7206 0.057 Uiso 1 1 calc R . .
C18A C 0.4591(2) -0.0029(2) 0.6856(2) 0.0710(12) Uani 1 1 d . . .
H18A H 0.4305 0.0100 0.7226 0.085 Uiso 1 1 calc R . .
H18B H 0.4400 -0.0444 0.6685 0.085 Uiso 1 1 calc R . .
H18C H 0.4559 0.0317 0.6535 0.085 Uiso 1 1 calc R . .
C18B C 0.5436(3) -0.06137(19) 0.75872(18) 0.0817(15) Uani 1 1 d . . .
H18D H 0.5946 -0.0661 0.7711 0.098 Uiso 1 1 calc R . .
H18E H 0.5245 -0.1043 0.7453 0.098 Uiso 1 1 calc R . .
H18F H 0.5152 -0.0452 0.7946 0.098 Uiso 1 1 calc R . .
C21 C 0.59453(15) 0.22879(14) 0.76507(12) 0.0269(6) Uani 1 1 d . . .
C22 C 0.63734(17) 0.28525(14) 0.77348(13) 0.0335(7) Uani 1 1 d . . .
C23 C 0.63235(19) 0.31807(16) 0.83081(15) 0.0435(8) Uani 1 1 d . . .
H23 H 0.6610 0.3565 0.8376 0.052 Uiso 1 1 calc R . .
C24 C 0.58701(19) 0.29634(16) 0.87803(15) 0.0438(8) Uani 1 1 d . . .
H24 H 0.5838 0.3202 0.9165 0.053 Uiso 1 1 calc R . .
C25 C 0.54660(17) 0.24033(16) 0.86950(14) 0.0381(8) Uani 1 1 d . . .
H25 H 0.5156 0.2255 0.9024 0.046 Uiso 1 1 calc R . .
C26 C 0.55008(16) 0.20457(14) 0.81355(13) 0.0307(7) Uani 1 1 d . . .
C27 C 0.68975(18) 0.31178(15) 0.72389(16) 0.0415(8) Uani 1 1 d . . .
H27 H 0.6802 0.2875 0.6837 0.050 Uiso 1 1 calc R . .
C27A C 0.7679(2) 0.2972(2) 0.74358(18) 0.0601(10) Uani 1 1 d . . .
H27A H 0.7735 0.2498 0.7513 0.072 Uiso 1 1 calc R . .
H27B H 0.7793 0.3217 0.7822 0.072 Uiso 1 1 calc R . .
H27C H 0.8012 0.3109 0.7100 0.072 Uiso 1 1 calc R . .
C27B C 0.6795(2) 0.38547(17) 0.71085(18) 0.0636(11) Uani 1 1 d . . .
H27D H 0.6290 0.3937 0.6981 0.076 Uiso 1 1 calc R . .
H27E H 0.7124 0.3992 0.6770 0.076 Uiso 1 1 calc R . .
H27F H 0.6904 0.4107 0.7491 0.076 Uiso 1 1 calc R . .
C28 C 0.50444(18) 0.14254(16) 0.80768(15) 0.0413(8) Uani 1 1 d . . .
H28 H 0.5139 0.1231 0.7652 0.050 Uiso 1 1 calc R . .
C28A C 0.5274(2) 0.09169(19) 0.85695(19) 0.0700(12) Uani 1 1 d . . .
H28A H 0.5797 0.0833 0.8533 0.084 Uiso 1 1 calc R . .
H28B H 0.5006 0.0504 0.8500 0.084 Uiso 1 1 calc R . .
H28C H 0.5165 0.1086 0.8991 0.084 Uiso 1 1 calc R . .
C28B C 0.4237(2) 0.1562(2) 0.8126(2) 0.0782(14) Uani 1 1 d . . .
H28D H 0.3968 0.1147 0.8082 0.094 Uiso 1 1 calc R . .
H28E H 0.4091 0.1867 0.7791 0.094 Uiso 1 1 calc R . .
H28F H 0.4130 0.1759 0.8537 0.094 Uiso 1 1 calc R . .
C31 C 0.50410(15) 0.30957(14) 0.54769(13) 0.0278(6) Uani 1 1 d . . .
C32 C 0.57748(17) 0.32357(15) 0.54232(15) 0.0403(8) Uani 1 1 d . . .
H32 H 0.6111 0.2885 0.5360 0.048 Uiso 1 1 calc R . .
C33 C 0.60267(19) 0.38784(17) 0.54598(17) 0.0502(9) Uani 1 1 d . . .
H33 H 0.6533 0.3966 0.5434 0.060 Uiso 1 1 calc R . .
C34 C 0.5543(2) 0.43897(16) 0.55338(16) 0.0470(9) Uani 1 1 d . . .
H34 H 0.5715 0.4831 0.5554 0.056 Uiso 1 1 calc R . .
C35 C 0.48150(19) 0.42648(15) 0.55784(15) 0.0422(8) Uani 1 1 d . . .
H35 H 0.4483 0.4620 0.5631 0.051 Uiso 1 1 calc R . .
C36 C 0.45557(17) 0.36193(14) 0.55478(14) 0.0353(7) Uani 1 1 d . . .
H36 H 0.4048 0.3536 0.5575 0.042 Uiso 1 1 calc R . .
C41 C 0.38182(15) 0.21762(14) 0.56167(13) 0.0278(6) Uani 1 1 d . . .
C42 C 0.32955(17) 0.24838(15) 0.52430(15) 0.0385(8) Uani 1 1 d . . .
H42 H 0.3444 0.2768 0.4911 0.046 Uiso 1 1 calc R . .
C43 C 0.25650(18) 0.23807(18) 0.53496(18) 0.0502(9) Uani 1 1 d . . .
H43 H 0.2213 0.2604 0.5100 0.060 Uiso 1 1 calc R . .
C44 C 0.2347(2) 0.1957(2) 0.58154(19) 0.0585(10) Uani 1 1 d . . .
H44 H 0.1843 0.1883 0.5885 0.070 Uiso 1 1 calc R . .
C45 C 0.2846(2) 0.16401(18) 0.61798(18) 0.0527(9) Uani 1 1 d . . .
H45 H 0.2691 0.1342 0.6498 0.063 Uiso 1 1 calc R . .
C46 C 0.35801(17) 0.17539(16) 0.60861(14) 0.0399(8) Uani 1 1 d . . .
H46 H 0.3926 0.1539 0.6348 0.048 Uiso 1 1 calc R . .

loop_
_atom_site_aniso_label
_atom_site_aniso_U_11
_atom_site_aniso_U_22
_atom_site_aniso_U_33
_atom_site_aniso_U_23
_atom_site_aniso_U_13
_atom_site_aniso_U_12
Cl1 0.0366(5) 0.0589(6) 0.0626(6) -0.0202(5) 0.0151(4) -0.0131(4)
Cl2 0.0851(7) 0.0481(5) 0.0489(5) -0.0053(4) -0.0359(5) 0.0201(5)
P 0.0278(4) 0.0255(4) 0.0231(4) 0.0014(3) 0.0004(3) 0.0036(3)
Al 0.0297(5) 0.0286(5) 0.0280(5) -0.0052(4) -0.0058(4) 0.0045(4)
N1 0.0296(13) 0.0221(12) 0.0229(12) -0.0003(10) -0.0016(10) 0.0038(10)
N2 0.0291(13) 0.0225(12) 0.0210(12) -0.0013(10) -0.0002(10) 0.0008(10)
C1 0.0353(17) 0.0276(15) 0.0349(16) -0.0035(13) -0.0084(14) 0.0010(13)
C2 0.0278(15) 0.0229(14) 0.0222(14) 0.0014(11) 0.0040(12) -0.0031(12)
C3 0.0272(15) 0.0220(14) 0.0227(14) 0.0000(11) 0.0021(11) -0.0011(12)
C4 0.0289(16) 0.0212(14) 0.0256(15) -0.0002(11) 0.0023(12) -0.0015(12)
C5 0.0366(17) 0.0351(17) 0.0263(15) -0.0032(13) -0.0011(13) 0.0081(14)
C11 0.0341(17) 0.0229(15) 0.0297(16) -0.0020(12) -0.0084(13) 0.0041(12)
C12 0.0366(17) 0.0300(16) 0.0329(16) -0.0033(13) -0.0093(13) 0.0093(14)
C13 0.056(2) 0.0327(17) 0.0377(18) -0.0125(15) -0.0094(16) 0.0164(16)
C14 0.075(3) 0.0211(16) 0.049(2) -0.0062(15) -0.0152(19) 0.0100(16)
C15 0.069(2) 0.0243(17) 0.043(2) 0.0030(14) -0.0111(18) -0.0026(16)
C16 0.050(2) 0.0227(15) 0.0330(17) -0.0007(13) -0.0067(14) -0.0029(14)
C17 0.047(2) 0.0341(18) 0.0382(18) -0.0023(14) 0.0083(15) 0.0153(15)
C17A 0.052(2) 0.051(2) 0.088(3) 0.001(2) 0.021(2) 0.0136(19)
C17B 0.106(4) 0.059(2) 0.038(2) 0.0031(18) 0.010(2) 0.027(2)
C18 0.074(3) 0.0288(17) 0.0385(19) 0.0014(15) 0.0070(18) -0.0096(17)
C18A 0.074(3) 0.068(3) 0.070(3) -0.005(2) 0.026(2) -0.011(2)
C18B 0.148(5) 0.050(2) 0.047(2) 0.017(2) 0.020(3) -0.007(3)
C21 0.0301(16) 0.0278(15) 0.0228(14) -0.0033(12) -0.0032(12) 0.0049(12)
C22 0.0398(18) 0.0307(17) 0.0301(16) -0.0048(13) -0.0024(13) 0.0016(14)
C23 0.054(2) 0.0354(18) 0.0411(19) -0.0109(15) -0.0041(16) -0.0028(16)
C24 0.058(2) 0.044(2) 0.0291(17) -0.0127(15) -0.0028(16) 0.0056(17)
C25 0.0424(19) 0.045(2) 0.0268(16) -0.0024(14) 0.0052(14) 0.0097(15)
C26 0.0330(17) 0.0326(16) 0.0265(15) 0.0003(13) -0.0018(13) 0.0053(13)
C27 0.049(2) 0.0320(17) 0.0434(19) -0.0056(15) 0.0046(15) -0.0110(15)
C27A 0.051(2) 0.067(3) 0.062(2) -0.011(2) 0.0083(19) -0.019(2)
C27B 0.092(3) 0.040(2) 0.059(3) 0.0002(19) 0.017(2) -0.013(2)
C28 0.047(2) 0.044(2) 0.0329(17) 0.0003(15) 0.0113(15) -0.0080(16)
C28A 0.103(4) 0.048(2) 0.059(3) 0.014(2) 0.007(2) -0.011(2)
C28B 0.048(3) 0.085(3) 0.102(4) -0.003(3) 0.013(2) -0.020(2)
C31 0.0341(17) 0.0258(15) 0.0236(15) 0.0021(12) 0.0021(12) 0.0012(12)
C32 0.0377(18) 0.0323(17) 0.051(2) 0.0038(15) 0.0129(16) 0.0029(14)
C33 0.040(2) 0.041(2) 0.069(3) 0.0073(18) 0.0114(18) -0.0095(16)
C34 0.058(2) 0.0292(18) 0.054(2) 0.0035(16) 0.0040(18) -0.0099(16)
C35 0.053(2) 0.0274(17) 0.046(2) 0.0004(14) -0.0019(16) 0.0072(15)
C36 0.0352(17) 0.0308(16) 0.0399(18) 0.0024(14) -0.0031(14) 0.0037(14)
C41 0.0271(16) 0.0288(16) 0.0276(15) -0.0039(12) 0.0015(12) 0.0012(13)
C42 0.0368(19) 0.0370(18) 0.0418(19) -0.0008(14) -0.0066(14) 0.0035(15)
C43 0.0310(19) 0.052(2) 0.068(3) -0.0083(19) -0.0097(17) 0.0058(16)
C44 0.031(2) 0.065(3) 0.079(3) -0.012(2) 0.0135(19) -0.0060(18)
C45 0.047(2) 0.053(2) 0.057(2) 0.0042(18) 0.0205(18) -0.0062(18)
C46 0.0383(19) 0.0434(19) 0.0380(18) 0.0013(15) 0.0054(14) -0.0002(15)

_geom_special_details            
;
 All esds (except the esd in the dihedral angle between two l.s. planes)
 are estimated using the full covariance matrix.  The cell esds are taken
 into account individually in the estimation of esds in distances, angles
 and torsion angles; correlations between esds in cell parameters are only
 used when they are defined by crystal symmetry.  An approximate (isotropic)
 treatment of cell esds is used for estimating esds involving l.s. planes.
;

loop_
_geom_bond_atom_site_label_1
_geom_bond_atom_site_label_2
_geom_bond_distance
_geom_bond_site_symmetry_2
_geom_bond_publ_flag
Cl1 Al 2.1228(12) . ?
Cl2 Al 2.1007(12) . ?
P C3 1.830(3) . ?
P C41 1.831(3) . ?
P C31 1.831(3) . ?
Al N1 1.861(2) . ?
Al N2 1.867(2) . ?
N1 C2 1.334(3) . ?
N1 C11 1.462(3) . ?
N2 C4 1.339(3) . ?
N2 C21 1.467(3) . ?
C1 C2 1.511(4) . ?
C2 C3 1.423(4) . ?
C3 C4 1.433(4) . ?
C4 C5 1.503(4) . ?
C11 C12 1.394(4) . ?
C11 C16 1.408(4) . ?
C12 C13 1.400(4) . ?
C12 C17 1.521(4) . ?
C13 C14 1.367(5) . ?
C14 C15 1.371(5) . ?
C15 C16 1.386(4) . ?
C16 C18 1.522(4) . ?
C17 C17A 1.526(5) . ?
C17 C17B 1.530(5) . ?
C18 C18A 1.514(5) . ?
C18 C18B 1.521(5) . ?
C21 C22 1.399(4) . ?
C21 C26 1.403(4) . ?
C22 C23 1.390(4) . ?
C22 C27 1.525(4) . ?
C23 C24 1.376(5) . ?
C24 C25 1.368(4) . ?
C25 C26 1.393(4) . ?
C26 C28 1.516(4) . ?
C27 C27A 1.525(5) . ?
C27 C27B 1.529(4) . ?
C28 C28B 1.513(5) . ?
C28 C28A 1.527(5) . ?
C31 C32 1.383(4) . ?
C31 C36 1.394(4) . ?
C32 C33 1.383(4) . ?
C33 C34 1.374(5) . ?
C34 C35 1.365(5) . ?
C35 C36 1.393(4) . ?
C41 C46 1.384(4) . ?
C41 C42 1.393(4) . ?
C42 C43 1.378(4) . ?
C43 C44 1.369(5) . ?
C44 C45 1.361(5) . ?
C45 C46 1.383(4) . ?

loop_
_geom_angle_atom_site_label_1
_geom_angle_atom_site_label_2
_geom_angle_atom_site_label_3
_geom_angle
_geom_angle_site_symmetry_1
_geom_angle_site_symmetry_3
_geom_angle_publ_flag
C3 P C41 105.68(12) . . ?
C3 P C31 103.36(12) . . ?
C41 P C31 106.50(13) . . ?
N1 Al N2 98.32(10) . . ?
N1 Al Cl2 111.43(8) . . ?
N2 Al Cl2 115.08(8) . . ?
N1 Al Cl1 108.61(8) . . ?
N2 Al Cl1 110.26(8) . . ?
Cl2 Al Cl1 112.21(6) . . ?
C2 N1 C11 119.2(2) . . ?
C2 N1 Al 118.22(18) . . ?
C11 N1 Al 122.09(17) . . ?
C4 N2 C21 117.0(2) . . ?
C4 N2 Al 118.60(18) . . ?
C21 N2 Al 124.23(17) . . ?
N1 C2 C3 123.5(2) . . ?
N1 C2 C1 118.7(2) . . ?
C3 C2 C1 117.8(2) . . ?
C2 C3 C4 123.9(2) . . ?
C2 C3 P 114.02(19) . . ?
C4 C3 P 122.1(2) . . ?
N2 C4 C3 122.9(2) . . ?
N2 C4 C5 117.8(2) . . ?
C3 C4 C5 119.2(2) . . ?
C12 C11 C16 121.5(3) . . ?
C12 C11 N1 120.5(3) . . ?
C16 C11 N1 118.0(2) . . ?
C11 C12 C13 118.0(3) . . ?
C11 C12 C17 123.4(3) . . ?
C13 C12 C17 118.7(3) . . ?
C14 C13 C12 120.8(3) . . ?
C13 C14 C15 120.7(3) . . ?
C14 C15 C16 121.2(3) . . ?
C15 C16 C11 117.8(3) . . ?
C15 C16 C18 120.3(3) . . ?
C11 C16 C18 121.9(3) . . ?
C12 C17 C17A 110.3(3) . . ?
C12 C17 C17B 112.5(3) . . ?
C17A C17 C17B 110.1(3) . . ?
C18A C18 C18B 110.5(3) . . ?
C18A C18 C16 112.0(3) . . ?
C18B C18 C16 112.4(3) . . ?
C22 C21 C26 121.3(3) . . ?
C22 C21 N2 119.8(2) . . ?
C26 C21 N2 118.8(2) . . ?
C23 C22 C21 117.7(3) . . ?
C23 C22 C27 118.6(3) . . ?
C21 C22 C27 123.7(3) . . ?
C24 C23 C22 121.7(3) . . ?
C25 C24 C23 119.9(3) . . ?
C24 C25 C26 121.3(3) . . ?
C25 C26 C21 118.1(3) . . ?
C25 C26 C28 118.4(3) . . ?
C21 C26 C28 123.5(3) . . ?
C22 C27 C27A 109.8(3) . . ?
C22 C27 C27B 113.0(3) . . ?
C27A C27 C27B 110.7(3) . . ?
C28B C28 C26 112.7(3) . . ?
C28B C28 C28A 110.2(3) . . ?
C26 C28 C28A 110.5(3) . . ?
C32 C31 C36 118.5(3) . . ?
C32 C31 P 116.4(2) . . ?
C36 C31 P 125.0(2) . . ?
C31 C32 C33 121.0(3) . . ?
C34 C33 C32 119.9(3) . . ?
C35 C34 C33 120.2(3) . . ?
C34 C35 C36 120.4(3) . . ?
C35 C36 C31 120.0(3) . . ?
C46 C41 C42 117.9(3) . . ?
C46 C41 P 121.3(2) . . ?
C42 C41 P 120.0(2) . . ?
C43 C42 C41 120.7(3) . . ?
C44 C43 C42 119.9(3) . . ?
C45 C44 C43 120.6(3) . . ?
C44 C45 C46 119.8(3) . . ?
C45 C46 C41 121.0(3) . . ?

loop_
_geom_torsion_atom_site_label_1
_geom_torsion_atom_site_label_2
_geom_torsion_atom_site_label_3
_geom_torsion_atom_site_label_4
_geom_torsion
_geom_torsion_site_symmetry_1
_geom_torsion_site_symmetry_2
_geom_torsion_site_symmetry_3
_geom_torsion_site_symmetry_4
_geom_torsion_publ_flag
N2 Al N1 C2 35.9(2) . . . . ?
Cl2 Al N1 C2 157.07(18) . . . . ?
Cl1 Al N1 C2 -78.8(2) . . . . ?
N2 Al N1 C11 -152.5(2) . . . . ?
Cl2 Al N1 C11 -31.3(2) . . . . ?
Cl1 Al N1 C11 92.8(2) . . . . ?
N1 Al N2 C4 -33.6(2) . . . . ?
Cl2 Al N2 C4 -152.08(18) . . . . ?
Cl1 Al N2 C4 79.8(2) . . . . ?
N1 Al N2 C21 151.1(2) . . . . ?
Cl2 Al N2 C21 32.7(2) . . . . ?
Cl1 Al N2 C21 -95.5(2) . . . . ?
C11 N1 C2 C3 172.9(2) . . . . ?
Al N1 C2 C3 -15.2(3) . . . . ?
C11 N1 C2 C1 -3.9(4) . . . . ?
Al N1 C2 C1 167.95(19) . . . . ?
N1 C2 C3 C4 -18.3(4) . . . . ?
C1 C2 C3 C4 158.6(3) . . . . ?
N1 C2 C3 P 162.4(2) . . . . ?
C1 C2 C3 P -20.8(3) . . . . ?
C41 P C3 C2 102.1(2) . . . . ?
C31 P C3 C2 -146.1(2) . . . . ?
C41 P C3 C4 -77.2(2) . . . . ?
C31 P C3 C4 34.5(2) . . . . ?
C21 N2 C4 C3 -173.8(2) . . . . ?
Al N2 C4 C3 10.6(3) . . . . ?
C21 N2 C4 C5 5.0(4) . . . . ?
Al N2 C4 C5 -170.60(19) . . . . ?
C2 C3 C4 N2 20.9(4) . . . . ?
P C3 C4 N2 -159.8(2) . . . . ?
C2 C3 C4 C5 -157.9(3) . . . . ?
P C3 C4 C5 21.4(3) . . . . ?
C2 N1 C11 C12 82.9(3) . . . . ?
Al N1 C11 C12 -88.7(3) . . . . ?
C2 N1 C11 C16 -98.6(3) . . . . ?
Al N1 C11 C16 89.9(3) . . . . ?
C16 C11 C12 C13 2.5(4) . . . . ?
N1 C11 C12 C13 -179.0(3) . . . . ?
C16 C11 C12 C17 -177.8(3) . . . . ?
N1 C11 C12 C17 0.7(4) . . . . ?
C11 C12 C13 C14 -0.5(5) . . . . ?
C17 C12 C13 C14 179.8(3) . . . . ?
C12 C13 C14 C15 -0.5(5) . . . . ?
C13 C14 C15 C16 -0.5(5) . . . . ?
C14 C15 C16 C11 2.4(5) . . . . ?
C14 C15 C16 C18 -179.4(3) . . . . ?
C12 C11 C16 C15 -3.4(4) . . . . ?
N1 C11 C16 C15 178.0(3) . . . . ?
C12 C11 C16 C18 178.4(3) . . . . ?
N1 C11 C16 C18 -0.2(4) . . . . ?
C11 C12 C17 C17A 112.5(3) . . . . ?
C13 C12 C17 C17A -67.8(4) . . . . ?
C11 C12 C17 C17B -124.1(3) . . . . ?
C13 C12 C17 C17B 55.6(4) . . . . ?
C15 C16 C18 C18A -91.9(4) . . . . ?
C11 C16 C18 C18A 86.3(4) . . . . ?
C15 C16 C18 C18B 33.3(5) . . . . ?
C11 C16 C18 C18B -148.6(3) . . . . ?
C4 N2 C21 C22 -92.2(3) . . . . ?
Al N2 C21 C22 83.2(3) . . . . ?
C4 N2 C21 C26 84.6(3) . . . . ?
Al N2 C21 C26 -100.1(3) . . . . ?
C26 C21 C22 C23 -2.3(4) . . . . ?
N2 C21 C22 C23 174.3(3) . . . . ?
C26 C21 C22 C27 176.6(3) . . . . ?
N2 C21 C22 C27 -6.8(4) . . . . ?
C21 C22 C23 C24 -0.1(5) . . . . ?
C27 C22 C23 C24 -179.0(3) . . . . ?
C22 C23 C24 C25 1.4(5) . . . . ?
C23 C24 C25 C26 -0.3(5) . . . . ?
C24 C25 C26 C21 -2.1(4) . . . . ?
C24 C25 C26 C28 179.3(3) . . . . ?
C22 C21 C26 C25 3.4(4) . . . . ?
N2 C21 C26 C25 -173.3(2) . . . . ?
C22 C21 C26 C28 -178.1(3) . . . . ?
N2 C21 C26 C28 5.3(4) . . . . ?
C23 C22 C27 C27A 72.6(4) . . . . ?
C21 C22 C27 C27A -106.3(3) . . . . ?
C23 C22 C27 C27B -51.6(4) . . . . ?
C21 C22 C27 C27B 129.6(3) . . . . ?
C25 C26 C28 C28B 61.8(4) . . . . ?
C21 C26 C28 C28B -116.7(3) . . . . ?
C25 C26 C28 C28A -62.0(4) . . . . ?
C21 C26 C28 C28A 119.5(3) . . . . ?
C3 P C31 C32 60.0(3) . . . . ?
C41 P C31 C32 171.1(2) . . . . ?
C3 P C31 C36 -123.8(2) . . . . ?
C41 P C31 C36 -12.7(3) . . . . ?
C36 C31 C32 C33 2.1(5) . . . . ?
P C31 C32 C33 178.6(3) . . . . ?
C31 C32 C33 C34 -1.7(5) . . . . ?
C32 C33 C34 C35 0.7(5) . . . . ?
C33 C34 C35 C36 -0.2(5) . . . . ?
C34 C35 C36 C31 0.6(5) . . . . ?
C32 C31 C36 C35 -1.5(4) . . . . ?
P C31 C36 C35 -177.7(2) . . . . ?
C3 P C41 C46 -15.2(3) . . . . ?
C31 P C41 C46 -124.6(2) . . . . ?
C3 P C41 C42 175.2(2) . . . . ?
C31 P C41 C42 65.7(3) . . . . ?
C46 C41 C42 C43 1.5(5) . . . . ?
P C41 C42 C43 171.5(2) . . . . ?
C41 C42 C43 C44 -1.9(5) . . . . ?
C42 C43 C44 C45 0.7(6) . . . . ?
C43 C44 C45 C46 1.0(6) . . . . ?
C44 C45 C46 C41 -1.4(5) . . . . ?
C42 C41 C46 C45 0.1(5) . . . . ?
P C41 C46 C45 -169.7(3) . . . . ?

_diffrn_measured_fraction_theta_max 0.994
_diffrn_reflns_theta_full        26.49
_diffrn_measured_fraction_theta_full 0.994
_refine_diff_density_max         0.476
_refine_diff_density_min         -0.474
_refine_diff_density_rms         0.056
loop_
_publ_author_name
_publ_author_address
'P.J. Ragogna'
;Department of Chemistry
Dalhousie University
Halifax, NS
B3H 4J3, CANADA
;
'N. Burford'
;Department of Chemistry
Dalhousie University
Halifax, NS
B3H 4J3, CANADA
;
'M. Deon'
;Department of Chemistry
Dalhousie University
Halifax, NS
B3H 4J3, CANADA
;
'R. McDonald'
;X-ray Crystallography Laboratory
Department of Chemistry
University of Alberta
Edmonton, AB
T6G 2G2, CANADA
;
'M.J. Ferguson'
;X-ray Crystallography Laboratory
Department of Chemistry
University of Alberta
Edmonton, AB
T6G 2G2, CANADA
;
